# Supplementary material for: Low loss photopatternable matrix materials for LWIR-metamaterial applications
Source: Royal Society of Chemistry journal article supplement (doi:10.1039/c1jm12761f), 2011-01-01
Supplement: c1jm12761f.pdf [file c1jm12761f.pdf]

## Supporting Information

# Low Loss Photopatternable Matrix Materials for LWIR-Metamaterial Applications

Roger D. Rasberry,<sup>1</sup> Yun-Ju Lee,<sup>2</sup> James C. Ginn,<sup>3,4</sup> Paul F. Hines,<sup>5</sup> Christian L. Arrington,<sup>6</sup> Andrea E. Sanchez,<sup>1</sup> Michael T. Brumbach,<sup>7</sup> Paul G. Clem,<sup>8</sup> David W. Peters,<sup>3</sup> Michael B. Sinclair,<sup>2</sup> and Shawn M. Dirk<sup>1,\*</sup>

<sup>1</sup>Organic Materials Department, <sup>2</sup>Electronic Materials and Nanostructures Department, <sup>3</sup>Applied Photonic Microsystems Department, <sup>4</sup>Center for Integrated Nanotechnologies, <sup>5</sup>Integrated Microdevice Systems Department, <sup>6</sup>Photonic Microsystems Technologies Department, <sup>7</sup>Materials Characterization Department, and <sup>8</sup>Direct Write Technology Group, Sandia National Laboratories, P.O. Box 5800, Albuquerque, New Mexico 87185, United States

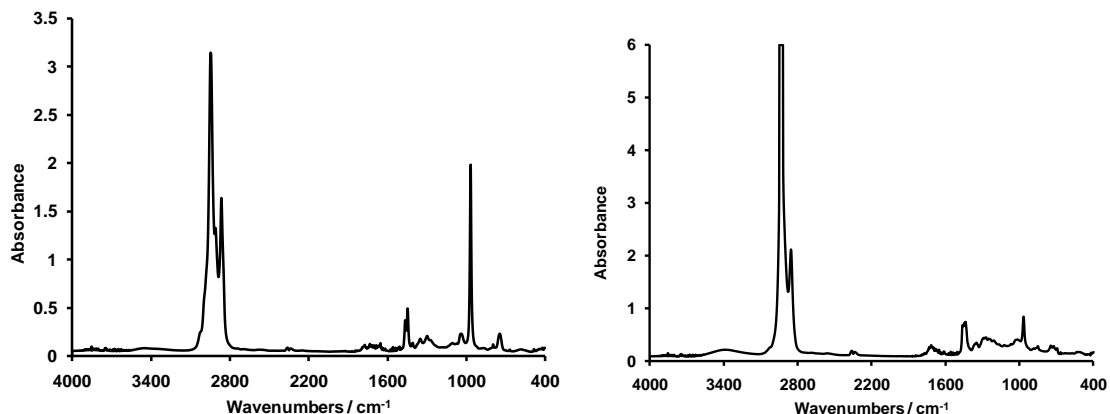

**Figure S1.** IR spectra for polynorbornene taken from free-standing films (20-25  $\mu\text{m}$ ) before (left) and after cross-linking (right).

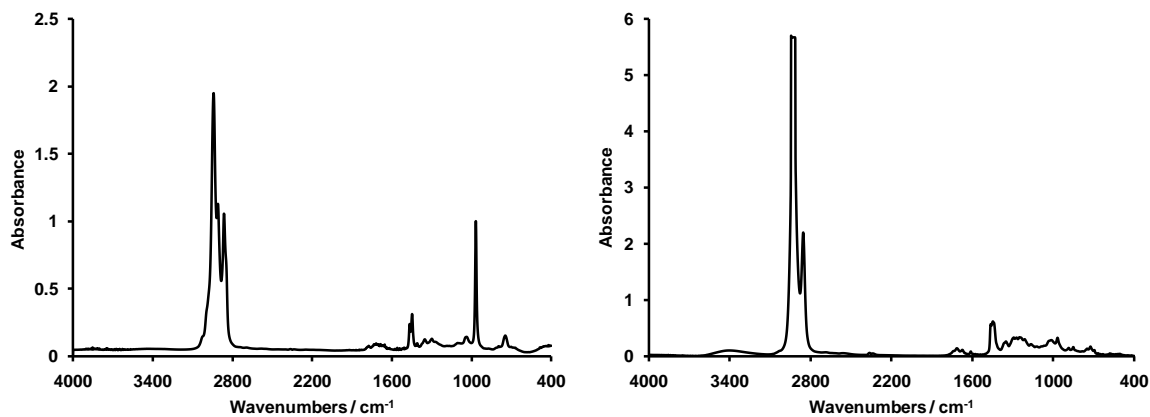

**Figure S2.** IR spectra for partially hydrogenated polynorbornene (18.2%) taken from free-standing films (20-25 μm) before (left) and after cross-linking (right).

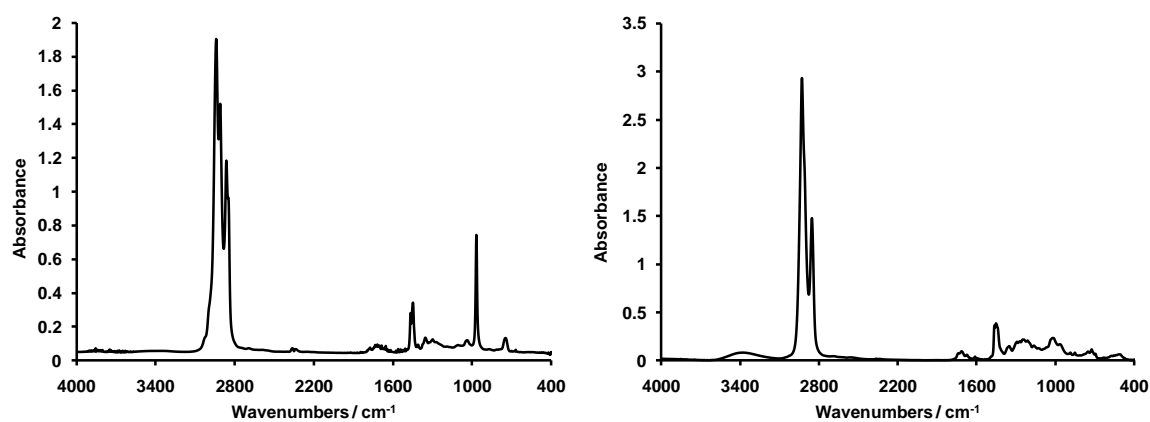

**Figure S3.** IR spectra for partially hydrogenated polynorbornene (41%) taken from free-standing films (20-25 μm) before (left) and after cross-linking (right).

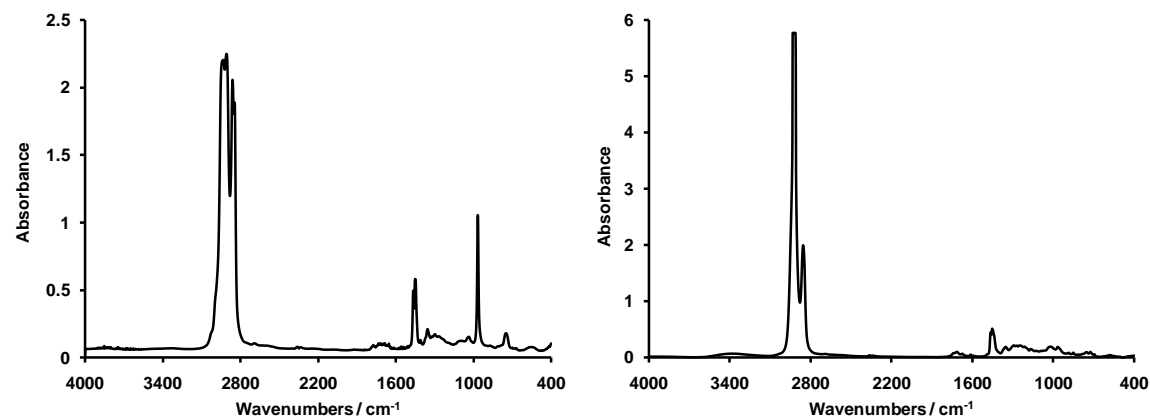

**Figure S4.** IR spectra for partially hydrogenated polynorbornene (55.9%) taken from free-standing films (20-25 μm) before (left) and after cross-linking (right).

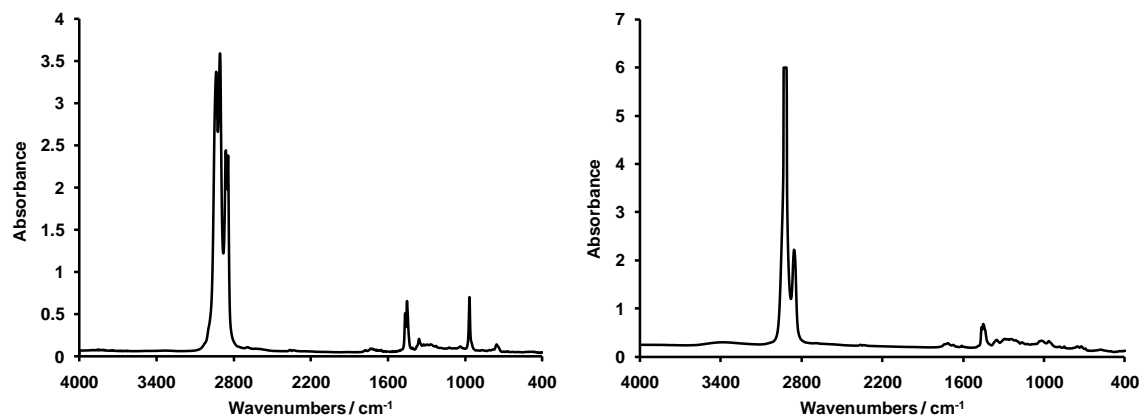

**Figure S5.** IR spectra for partially hydrogenated polynorbornene (72.4%) taken from free-standing films (20-25  $\mu\text{m}$ ) before (left) and after cross-linking (right).
